# Supplementary material for: First Detection and Molecular Analysis of Leishmania infantum DNA in Sand Flies of Kosovo
Source: MDPI journal article supplement (doi:10.3390/pathogens12101190), 2023-09-24
Supplement: s1 [file s1]

[illegible]

|                                      |                                                                                                          |              |
|--------------------------------------|----------------------------------------------------------------------------------------------------------|--------------|
| <b>OR344780.1 <i>L. infantum</i></b> | <b>G C T G G T G A G C T G C G A T G A C A A G A C A A T G G C T G C A A C G G C G G G C T G A T G C</b> | <b>[150]</b> |
| AY896777.1 <i>L. infantum</i>        | . . . . .                                                                                                | [150]        |
| JN400124.1 <i>L. infantum</i>        | . . . . .                                                                                                | [150]        |
| GQ302670.1 <i>L. infantum</i>        | . . . . .                                                                                                | [150]        |
| AY896786.1 <i>L. donovani</i>        | . . . . .                                                                                                | [150]        |
| AY896785.1 <i>L. donovani</i>        | . . . . .                                                                                                | [150]        |
| GQ302673.1 <i>L. donovani</i>        | . . . . .                                                                                                | [150]        |
| EU637909.1 <i>L. donovani</i>        | . . . . .                                                                                                | [150]        |
| JN400179.1 <i>L. tropica</i>         | . . . . . T . . . C G . . . . .                                                                          | [150]        |
| JN400177.1 <i>L. tropica</i>         | . . . . . T . . . G C . . . . .                                                                          | [150]        |
| DQ286773.1 <i>L. tropica</i>         | . . . . . T . . . G G . . . . .                                                                          | [150]        |
| XM_001681083.1 <i>L. major</i>       | . . . . . C . . G T G . . . . . T . . . G G . . . . .                                                    | [150]        |
| KY412785.1 <i>L. major</i>           | . . . . . C . . G T G . . . . . T . . . G G . . . . .                                                    | [150]        |
| KY412784.1 <i>L. major</i>           | . . . . . C . . G T G . . . . . T . . . G G . . . . . T                                                  | [150]        |
| XM_003872607.1 <i>L. mexicana</i>    | . . . . . . T G A . . G . . . . . G . . . . .                                                            | [150]        |
| XM_003872608.1 <i>L. mexicana</i>    | . . . . . . T G A . . G . . . . . G . . . . .                                                            | [150]        |

|                                      |                                                                                                            |              |
|--------------------------------------|------------------------------------------------------------------------------------------------------------|--------------|
| <b>OR344780.1 <i>L. infantum</i></b> | <b>T G C A G G C G T T C G A G T G G C T G C T G C G A C A C A T G T A C G G G A T C G T G T T C A C G</b> | <b>[200]</b> |
| AY896777.1 <i>L. infantum</i>        | . . . . .                                                                                                  | [200]        |
| JN400124.1 <i>L. infantum</i>        | . . . . .                                                                                                  | [200]        |
| GQ302670.1 <i>L. infantum</i>        | . . . . .                                                                                                  | [200]        |
| AY896786.1 <i>L. donovani</i>        | . . . . .                                                                                                  | [200]        |
| AY896785.1 <i>L. donovani</i>        | . . . . . T . . . . .                                                                                      | [200]        |
| GQ302673.1 <i>L. donovani</i>        | . . . . .                                                                                                  | [200]        |
| EU637909.1 <i>L. donovani</i>        | . . . . .                                                                                                  | [200]        |
| JN400179.1 <i>L. tropica</i>         | . . . . . A . . . . . A . . . . . C . A . . . . .                                                          | [200]        |
| JN400177.1 <i>L. tropica</i>         | . . . . . A . . . . . A . . . . . C . A . . . . .                                                          | [200]        |
| DQ286773.1 <i>L. tropica</i>         | . . . . . A . . . . . A . . . . . C . A . . . . .                                                          | [200]        |
| XM_001681083.1 <i>L. major</i>       | . . . . . A . . . . . G . . . . . A . . . . . A . . . . . C . . . . .                                      | [200]        |
| KY412785.1 <i>L. major</i>           | . . . . . A . . . . . G . . . . . A . . . . . A . . . . . C . . . . .                                      | [200]        |
| KY412784.1 <i>L. major</i>           | . . . . . A . . . . . G . . . . . A . . . . . A . . . . . C . . . . .                                      | [200]        |
| XM_003872607.1 <i>L. mexicana</i>    | . . . . . C . . . . . A . A . . . C . A . . . . C A . C . . . A . . . .                                    | [200]        |
| XM_003872608.1 <i>L. mexicana</i>    | . . . . . C . . . . . A . A . . . C . A . . . . C A . C . . . C A . . . .                                  | [200]        |

|                                      |                                                                                                            |              |
|--------------------------------------|------------------------------------------------------------------------------------------------------------|--------------|
| <b>OR344780.1 <i>L. infantum</i></b> | <b>G A G A A G A G C T A C C C C - T A C A C G T C C G G C A A C G G T G A T G T G G C C G A G T G C T</b> | <b>[250]</b> |
| AY896777.1 <i>L. infantum</i>        | . . . . . - . . . . .                                                                                      | [250]        |
| JN400124.1 <i>L. infantum</i>        | . . . . . - . . . . .                                                                                      | [250]        |
| GQ302670.1 <i>L. infantum</i>        | . . . . . - . . . . .                                                                                      | [250]        |
| AY896786.1 <i>L. donovani</i>        | . . C . . . . - . . . . .                                                                                  | [250]        |
| AY896785.1 <i>L. donovani</i>        | . . . . . - . . . . .                                                                                      | [250]        |
| GQ302673.1 <i>L. donovani</i>        | . . . . . - . . . . .                                                                                      | [250]        |
| EU637909.1 <i>L. donovani</i>        | . . . . . C . . . . .                                                                                      | [250]        |
| JN400179.1 <i>L. tropica</i>         | . . . G . C . . . . . - . . . G T . . . . A . . . C . . . . T . . . . C . . . . .                          | [250]        |
| JN400177.1 <i>L. tropica</i>         | . . . A G . C . . . . . - . . . G T . . . . A . . . C . . . . T . . . . C . . . . .                        | [250]        |
| DQ286773.1 <i>L. tropica</i>         | . . . G . C . . . . . - . . . G T . . . . A . . . G . . . . T . . . . C . . . . .                          | [250]        |
| XM_001681083.1 <i>L. major</i>       | . . . . . - . . . G T C . . . . .                                                                          | [250]        |
| KY412785.1 <i>L. major</i>           | . . . . . - . . . G T C . . . . .                                                                          | [250]        |
| KY412784.1 <i>L. major</i>           | . . . . . - . . . G T C . . . . .                                                                          | [250]        |
| XM_003872607.1 <i>L. mexicana</i>    | . . . G . C . . . . . - . . . G T . . . . . C T . . . . C . . . . .                                        | [250]        |
| XM_003872608.1 <i>L. mexicana</i>    | . . . G . C . . . . . - . . . G T . . . . . C T . . . . C . . . . .                                        | [250]        |

|                                      |                                                                                                            |              |
|--------------------------------------|------------------------------------------------------------------------------------------------------------|--------------|
| <b>OR344780.1 <i>L. infantum</i></b> | <b>T G A A C A G C A G T A A A C T C G T T C C C G G C G C G C A A A T C G A C G G C T A C G T G A T G</b> | <b>[300]</b> |
| AY896777.1 <i>L. infantum</i>        | . . . . .                                                                                                  | [300]        |
| JN400124.1 <i>L. infantum</i>        | . . . . .                                                                                                  | [300]        |
| GQ302670.1 <i>L. infantum</i>        | . . . . .                                                                                                  | [300]        |
| AY896786.1 <i>L. donovani</i>        | . . . . .                                                                                                  | [300]        |
| AY896785.1 <i>L. donovani</i>        | . . . . .                                                                                                  | [300]        |
| GQ302673.1 <i>L. donovani</i>        | . . . . .                                                                                                  | [300]        |
| EU637909.1 <i>L. donovani</i>        | . . . . .                                                                                                  | [300]        |
| JN400179.1 <i>L. tropica</i>         | C . . . . . C . . . . . T . . . . G . . . . . A . . . C .                                                  | [300]        |
| JN400177.1 <i>L. tropica</i>         | C . . . . . C . . . . . T . . . . G . . . . . T . . . C .                                                  | [300]        |
| DQ286773.1 <i>L. tropica</i>         | C . . . . . C . . . . . T . . . . G . . . . . A . . . C .                                                  | [300]        |
| XM_001681083.1 <i>L. major</i>       | C . . . . . G . . . . . C . . . . . T . . . . G . . . . . G . . . . T C .                                  | [300]        |
| KY412785.1 <i>L. major</i>           | C . . . . . G . . . . . C . . . . . T . . . . G . . . . . G . . . . T C .                                  | [300]        |
| KY412784.1 <i>L. major</i>           | C . . . . . G . . . . . C . . . . . T . . . . G . . . . . G . . . . T C .                                  | [300]        |
| XM_003872607.1 <i>L. mexicana</i>    | C . . . . . G . G . . . . G T . . . . T . . . . G . . . . . C . . . . T . .                                | [300]        |
| XM_003872608.1 <i>L. mexicana</i>    | C . . . . . G . G . . . . G T . . . . T . . . . G . . . . . C . . . . T . .                                | [300]        |

|                   |                    |   |   |   |   |   |   |   |   |   |   |   |   |   |   |   |   |   |   |   |   |   |   |   |   |   |   |   |   |   |   |   |   |   |   |   |   |   |   |   |   |   |   |   |   |   |   |   |       |       |       |   |   |       |       |       |   |   |       |
|-------------------|--------------------|---|---|---|---|---|---|---|---|---|---|---|---|---|---|---|---|---|---|---|---|---|---|---|---|---|---|---|---|---|---|---|---|---|---|---|---|---|---|---|---|---|---|---|---|---|---|---|-------|-------|-------|---|---|-------|-------|-------|---|---|-------|
| <b>OR344780.1</b> | <b>L. infantum</b> | A | T | C | C | C | G | A | G | C | A | A | C | G | A | A | A | C | G | G | T | T | A | T | G | G | C | T | G | C | G | T | G | G | C | T | T | G | C | G | G | A | G | A | A | T | G | G | C     | C     | [350] |   |   |       |       |       |   |   |       |
| AY896777.1        | L. infantum        | . | . | . | . | . | . | . | . | . | . | . | . | . | . | . | . | . | . | . | . | . | . | . | . | . | . | . | . | . | . | . | . | . | . | . | . | . | . | . | . | . | . | . | . | . | . | . | .     | .     | [350] |   |   |       |       |       |   |   |       |
| JN400124.1        | L. infantum        | . | . | . | . | . | . | . | . | . | . | . | . | . | . | . | . | . | . | . | . | . | . | . | . | . | . | . | . | . | . | . | . | . | . | . | . | . | . | . | . | . | . | . | . | . | . | . | .     | [350] |       |   |   |       |       |       |   |   |       |
| GQ302670.1        | L. infantum        | . | . | . | . | . | . | . | . | . | . | . | . | . | . | . | . | . | . | . | . | . | . | . | . | . | . | . | . | . | . | . | . | . | . | . | . | . | . | . | . | . | . | . | . | . | . | . | [350] |       |       |   |   |       |       |       |   |   |       |
| AY896786.1        | L. donovani        | . | . | . | . | . | . | . | . | . | . | . | . | . | . | . | . | . | . | . | . | . | . | . | . | . | . | . | . | . | . | . | . | . | . | . | . | . | . | . | . | . | . | . | . | . | . | . | [350] |       |       |   |   |       |       |       |   |   |       |
| AY896785.1        | L. donovani        | . | . | . | . | . | . | . | . | . | . | . | . | . | . | . | . | . | . | . | . | . | . | . | . | . | . | . | . | . | . | . | . | . | . | . | . | . | . | . | . | . | . | . | . | . | . | . | [350] |       |       |   |   |       |       |       |   |   |       |
| GQ302673.1        | L. donovani        | . | . | . | . | . | . | . | . | . | . | . | . | . | . | . | . | . | . | . | . | . | . | . | . | . | . | . | . | . | . | . | . | . | . | . | . | . | . | . | . | . | . | . | . | . | . | . | [350] |       |       |   |   |       |       |       |   |   |       |
| EU637909.1        | L. donovani        | . | . | . | . | . | . | . | . | . | . | . | . | . | . | . | . | . | . | . | . | . | . | . | . | . | . | . | . | . | . | . | . | . | . | . | . | . | . | . | . | . | . | . | . | . | . | . | [350] |       |       |   |   |       |       |       |   |   |       |
| JN400179.1        | L. tropica         | . | . | . | G | A | A | . | . | . | G | . | . | . | . | . | . | . | . | . | . | . | . | . | . | . | . | . | . | . | . | . | . | . | . | . | . | . | . | . | . | . | . | . | . | . | . | . | A     | .     | .     | . | . | [350] |       |       |   |   |       |
| JN400177.1        | L. tropica         | . | . | . | G | A | A | . | . | . | G | . | . | . | . | . | . | . | . | . | . | . | . | . | . | . | . | . | . | . | . | . | . | . | . | . | . | . | . | . | . | . | . | . | . | . | . | . | .     | .     | A     | . | . | .     | .     | [350] |   |   |       |
| DQ286773.1        | L. tropica         | . | . | . | G | A | A | . | . | . | G | . | . | . | . | . | . | . | . | . | . | . | . | . | . | . | . | . | . | . | . | . | . | . | . | . | . | . | . | . | . | . | . | . | . | . | . | . | .     | .     | A     | . | . | .     | .     | [350] |   |   |       |
| XM_001681083.1    | L. major           | . | . | G | G | A | A | . | . | . | G | . | . | . | . | G | A | . | . | . | . | . | . | . | . | . | . | . | . | . | . | . | . | . | . | . | . | . | . | . | . | . | . | . | . | . | . | . | .     | A     | .     | . | . | .     | [350] |       |   |   |       |
| KY412785.1        | L. major           | . | . | G | G | A | A | . | . | . | G | . | . | . | . | G | A | . | . | . | . | . | . | . | . | . | . | . | . | . | . | . | . | . | . | . | . | . | . | . | . | . | . | . | . | . | . | . | .     | A     | .     | . | . | .     | [350] |       |   |   |       |
| KY412784.1        | L. major           | . | . | G | G | A | A | . | . | . | G | . | . | . | . | G | A | . | . | . | . | . | . | . | . | . | . | . | . | . | . | . | . | . | . | . | . | . | . | . | . | . | . | . | . | . | . | . | .     | A     | .     | . | . | .     | [350] |       |   |   |       |
| XM_003872607.1    | L. mexicana        | . | . | . | G | G | A | . | . | . | G | . | . | . | . | A | . | C | G | . | . | . | . | . | . | . | . | . | . | . | . | . | . | . | . | . | . | . | . | . | . | . | . | . | . | . | . | . | .     | C     | .     | . | . | A     | .     | .     | . | . | [350] |
| XM_003872608.1    | L. mexicana        | . | . | . | G | G | A | . | . | . | G | . | . | . | . | A | . | C | G | . | . | . | . | . | . | . | . | . | . | . | . | . | . | . | . | . | . | . | . | . | . | . | . | . | . | . | . | . | .     | C     | .     | . | . | A     | .     | .     | . | . | [350] |



|                                      |                                                                                                            |              |
|--------------------------------------|------------------------------------------------------------------------------------------------------------|--------------|
| <b>OR344780.1 <i>L. infantum</i></b> | <b>G G G T G A G G A C T G G G G C G A G A A G G G C T A C G T G C G C G T G G C C A T G G G G C T G A</b> | <b>[550]</b> |
| AY896777.1 <i>L. infantum</i>        | . . . . .                                                                                                  | [550]        |
| JN400124.1 <i>L. infantum</i>        | . . . . .                                                                                                  | [550]        |
| GQ302670.1 <i>L. infantum</i>        | . . . . .                                                                                                  | [550]        |
| AY896786.1 <i>L. donovani</i>        | . . . . .                                                                                                  | [550]        |
| AY896785.1 <i>L. donovani</i>        | . . . . . A G . .                                                                                          | [550]        |
| GQ302673.1 <i>L. donovani</i>        | . . . . . A G . .                                                                                          | [550]        |
| EU637909.1 <i>L. donovani</i>        | . . . . .                                                                                                  | [550]        |
| JN400179.1 <i>L. tropica</i>         | . . . . . A . . . . . T . . . . . A . . . . . G . . .                                                      | [550]        |
| JN400177.1 <i>L. tropica</i>         | . . . . . A . . . . . T . . . . . A . . . . . G . . .                                                      | [550]        |
| DQ286773.1 <i>L. tropica</i>         | . . . . . . . . . . T . . . . . A . . . . . G . . .                                                        | [550]        |
| XM_001681083.1 <i>L. major</i>       | . . . . . . . . . . . . . . . A . . . . . G . . .                                                          | [550]        |
| KY412785.1 <i>L. major</i>           | . . . . . . . . . . . . . . . A . . . . . G . . .                                                          | [550]        |
| KY412784.1 <i>L. major</i>           | . . . . . . . . . . . . . . . A . . . . . G . . .                                                          | [550]        |
| XM_003872607.1 <i>L. mexicana</i>    | . . . . . G . . . . . C . . . . . T G . . . . . G . . .                                                    | [550]        |
| XM_003872608.1 <i>L. mexicana</i>    | . . . . . G . . . . . C . . . . . T G . . . . . G . . .                                                    | [550]        |

|                                      |                                                                                                            |              |
|--------------------------------------|------------------------------------------------------------------------------------------------------------|--------------|
| <b>OR344780.1 <i>L. infantum</i></b> | <b>A C G C G T G C C T G C T C A G T G A A T A C C C C G T G T C C G C G C A T G T G C C G C A G A G T</b> | <b>[600]</b> |
| AY896777.1 <i>L. infantum</i>        | . . . . .                                                                                                  | [600]        |
| JN400124.1 <i>L. infantum</i>        | . . . . .                                                                                                  | [600]        |
| GQ302670.1 <i>L. infantum</i>        | . . . . .                                                                                                  | [600]        |
| AY896786.1 <i>L. donovani</i>        | . . . . .                                                                                                  | [600]        |
| AY896785.1 <i>L. donovani</i>        | . . . . . G . . . . . T C C . . . . .                                                                      | [600]        |
| GQ302673.1 <i>L. donovani</i>        | . . . . . . . . . . T C C . . . . .                                                                        | [600]        |
| EU637909.1 <i>L. donovani</i>        | . . . . . . . . . . . . . . . . . . . . . G . . .                                                          | [600]        |
| JN400179.1 <i>L. tropica</i>         | . . . . . C . . . . .                                                                                      | [600]        |
| JN400177.1 <i>L. tropica</i>         | . . . . . C . . . . .                                                                                      | [600]        |
| DQ286773.1 <i>L. tropica</i>         | . . . . . C . . . . .                                                                                      | [600]        |
| XM_001681083.1 <i>L. major</i>       | . . . . . C . . G G . . . . . T . . . . . T . . . . . C                                                    | [600]        |
| KY412785.1 <i>L. major</i>           | . . . . . C . . G G . . . . . T . . . . . A . T . . . . . C                                                | [600]        |
| KY412784.1 <i>L. major</i>           | . . . . . C . . G G . . . . . T . . . . . T . . . . . C                                                    | [600]        |
| XM_003872607.1 <i>L. mexicana</i>    | . . . . . . . . . . . . . . . . . . . . . G . G . . . .                                                    | [600]        |
| XM_003872608.1 <i>L. mexicana</i>    | . . . . . . . . . . . . . . . . . . . . . G . G . . . .                                                    | [600]        |

|                                      |                          |              |
|--------------------------------------|--------------------------|--------------|
| <b>OR344780.1 <i>L. infantum</i></b> | <b>C T C A C C C C T</b> | <b>[609]</b> |
| AY896777.1 <i>L. infantum</i>        | . . . . .                | [609]        |
| JN400124.1 <i>L. infantum</i>        | . . . . .                | [609]        |
| GQ302670.1 <i>L. infantum</i>        | . . . . .                | [609]        |
| AY896786.1 <i>L. donovani</i>        | . . . . .                | [609]        |
| AY896785.1 <i>L. donovani</i>        | . . . . .                | [609]        |
| GQ302673.1 <i>L. donovani</i>        | . . . . .                | [609]        |
| EU637909.1 <i>L. donovani</i>        | . . . . .                | [609]        |
| JN400179.1 <i>L. tropica</i>         | . . T C . . . .          | [609]        |
| JN400177.1 <i>L. tropica</i>         | . C . . . . .            | [609]        |
| DQ286773.1 <i>L. tropica</i>         | . C . . . . .            | [609]        |
| XM_001681083.1 <i>L. major</i>       | . C . . . . .            | [609]        |
| KY412785.1 <i>L. major</i>           | . C . . . . .            | [609]        |
| KY412784.1 <i>L. major</i>           | . C . . . . .            | [609]        |
| XM_003872607.1 <i>L. mexicana</i>    | G C . G . . . .          | [609]        |
| XM_003872608.1 <i>L. mexicana</i>    | G C . G . . . .          | [609]        |
